# Supplementary material
Source: PubMed Central journal article supplement (PMC3823026)
Supplement: ja405072z_si_001.pdf [file ja405072z_si_001.pdf]

## SUPPORTING INFORMATION

# Protein-protein interaction regulates the direction of catalysis and electron transfer in a redox enzyme complex

Duncan G. G. McMillan, Sophie J. Marritt, Mackenzie A. Firer-Sherwood, Liang Shi, David J. Richardson, Stephen D. Evans, Sean J. Elliott, Julea N. Butt and Lars J. C. Jeuken

## RESULTS

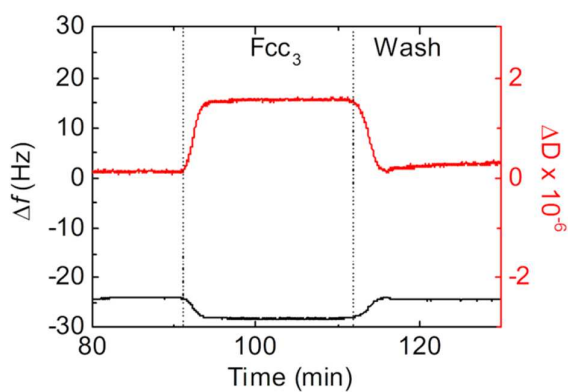

**Figure S1**

QCM-D results of a SiO<sub>2</sub> surface in buffer, plotting (black line, left axis) frequency and (red line, right axis) dissipation against time. For clarity reasons, only the traces after the formation of the SSM are shown. Changes in the solution composition flowing over the SSM are indicated: (Fcc3) 5 μM Fcc3/1 mM fumarate; (Wash) buffer only. SSM was formed with liposomes (90:10 POPC:Cardiolipin; 1% (w/w) MQ-7).

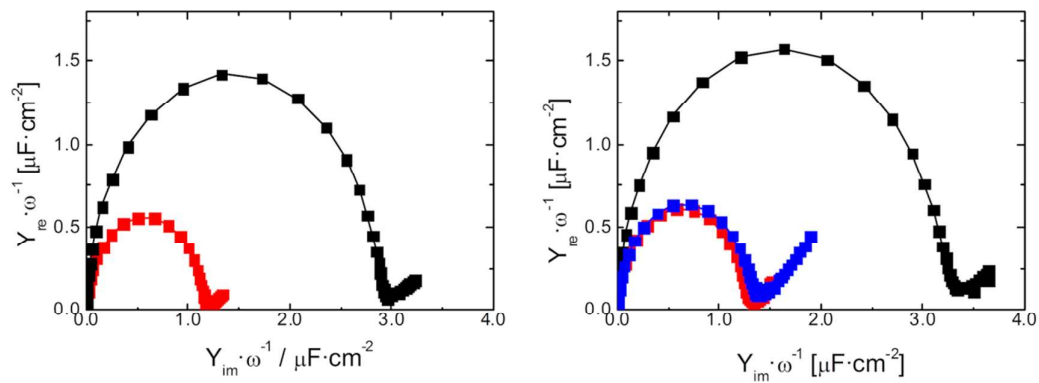

**Figure S2**

Electrochemical impedance spectra (EIS), represented in a Cole-Cole plot, of the SSM formation on a gold electrode modified with cholesterol tether. Frequency range 100 kHz to 100 mHz. (Left) EIS (Black) before and (Red) after addition of CymA proteoliposomes (90:10 POPC:Cardiolipin; 1% (w/w) CymA; 1% (w/w) MQ-7) are shown. (Right) EIS (Black) before and (Red, closed) after addition of liposomes (90:10 POPC:Cardiolipin; 1% (w/w) MQ-7) are shown and (Blue, open) after addition of 0.1  $\mu\text{M}$  CymA<sub>sol</sub>

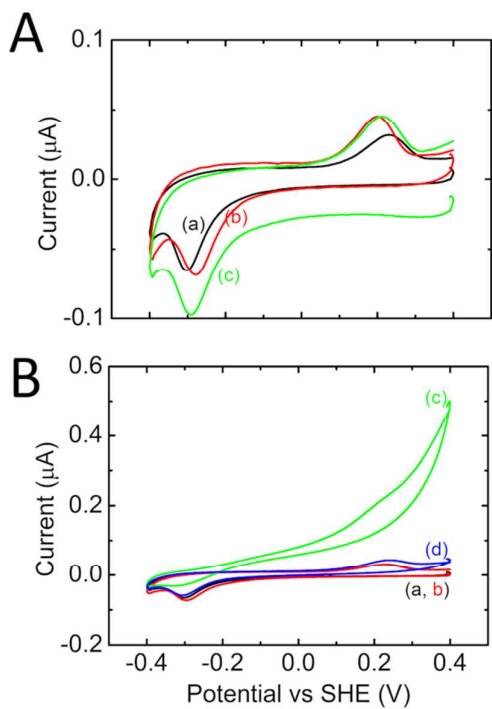

**Figure S3**

CVs of a SSM on a gold electrode modified with cholesterol tether. SSM was formed with liposomes (90:10 POPC:Cardiolipin; 1% (w/w) MQ-7). A) CVs (10 mV/s) (a) before and (b) after addition of 0.1 μM CymA<sub>sol</sub> and (c) a CV after rinsing out unbound CymA<sub>sol</sub> and addition of 1mM potassium ferricyanide B) CVs (a) before and (b, c) after addition of (b) 0.1 μM CymA<sub>sol</sub> and CVs after rinsing out unbound CymA<sub>sol</sub> and addition (c) 1mM sodium dithionite and (d) 1mM sodium dithionite with 10μM HQNO. On this scale, the difference between (a) and (b) is almost not visible.
